# Supplementary material
Source: PubMed Central journal article supplement (PMC9853033)
Supplement: EIJ-D-22-00164_Pellegrini_SD.pdf [file EIJ-D-22-00164_Pellegrini_SD.pdf]

## Supplementary data

**Supplementary Table 1. Standardised mean difference for baseline characteristics used for propensity score matching before and after matching.**

|                                                   | <b>Before matching</b> | <b>After matching</b> |
|---------------------------------------------------|------------------------|-----------------------|
|                                                   | <b>SMD</b>             | <b>SMD</b>            |
| Age, years                                        | 0.118                  | 0.025                 |
| Female gender                                     | 0.114                  | 0.030                 |
| Logistic EuroScore, %                             | 0.112                  | 0.083                 |
| NYHA III/IV                                       | 0.245                  | 0.035                 |
| Coronary artery disease                           | 0.277                  | 0.019                 |
| Previous PCI                                      | 0.122                  | 0.013                 |
| LVEF <35%                                         | 0.141                  | 0.045                 |
| Mean transvalvular gradient, mmHg                 | 0.261                  | 0.012                 |
| Indexed effective orifice area (cm <sup>2</sup> ) | 0.251                  | 0.052                 |
| Bicuspid aortic valve                             | 0.360                  | 0.050                 |
| Severe aortic valve calcification                 | 0.198                  | 0.069                 |
| Asymmetric calcification                          | 0.546                  | 0.072                 |
| Mean annulus diameter, mm                         | 0.044                  | 0.036                 |

**Abbreviations:** LV, left ventricular; NYHA, New York Heart Association functional class; PCI, percutaneous coronary intervention.

**Supplementary Table 2. Uni -and multivariate analysis for the primary endpoint device success, only variables with p<0.100 shown.**

|                                   | Device success –<br>n=173 | Device success +<br>n=1183 | p-value | OR    | 95% CI          | p-value          |
|-----------------------------------|---------------------------|----------------------------|---------|-------|-----------------|------------------|
| Age, years                        | 80.41 [76.83, 83.88]      | 81.85 [78.00, 85.00]       | 0.004   | 1.022 | [0.997 – 1.048] | 0.084            |
| Diabetes mellitus                 | 44 (25.4)                 | 397 (33.6)                 | 0.037   | 1.511 | [1.035 – 2.206] | <b>0.033</b>     |
| COPD                              | 34 (19.7)                 | 126 (10.7)                 | 0.001   | 0.466 | [0.302 – 0.719] | <b>&lt;0.001</b> |
| On dialysis                       | 5 (2.9)                   | 14 (1.2)                   | 0.083   | 0.400 | [0.134 – 1.196] | 0.101            |
| Coronary artery disease           | 108 (62.4)                | 826 (69.8)                 | 0.053   | 1.566 | [1.090 – 2.251] | 0.015            |
| Peripheral artery disease         | 37 (21.4)                 | 177 (15.0)                 | 0.034   | 0.652 | [0.430 – 0.991] | 0.045            |
| Mean transvalvular gradient, mmHg | 44.00 [36.50, 56.00]      | 43.00 [34.00, 52.00]       | 0.041   | 0.992 | [0.982 – 1.003] | 0.176            |
| Bicuspid valve                    | 21 (12.1)                 | 96 (8.1)                   | 0.083   | 1.083 | [0.624 – 1.883] | 0.776            |
| Asymmetric calcification          | 76 (43.9)                 | 383 (32.4)                 | 0.003   | 0.740 | [0.519 – 1.056] | 0.097            |
| Mean annular diameter, mm         | 23.85 [22.30-25.45]       | 24.35 [22.9, 25.8]         | 0.010   | 1.001 | [0.999 – 1.002] | 0.383            |
| Use of Neo2 THV                   | 51 (29.5)                 | 557 (47.1)                 | <0.001  | 1.900 | [1.270 – 2.844] | <b>0.002</b>     |
| Center                            |                           |                            |         | 1.175 | [0.846 – 1.631] | 0.335            |
| 1                                 | 84 (48.6)                 | 516 (43.6)                 | 0.025   |       |                 |                  |
| 2                                 | 88 (50.9)                 | 617 (52.2)                 |         |       |                 |                  |
| 3                                 | 1 (0.6)                   | 10 (0.8)                   |         |       |                 |                  |
| 4                                 | 0 (0)                     | 40 (3.4)                   |         |       |                 |                  |

**Abbreviations:** CI, Confidence Interval; COPD, chronic obstructive pulmonary disease; eGFR, estimated glomerular filtration rate; OR, Odds Ratio; THV, transcatheter heart

valve

**Supplemental Figure 1**

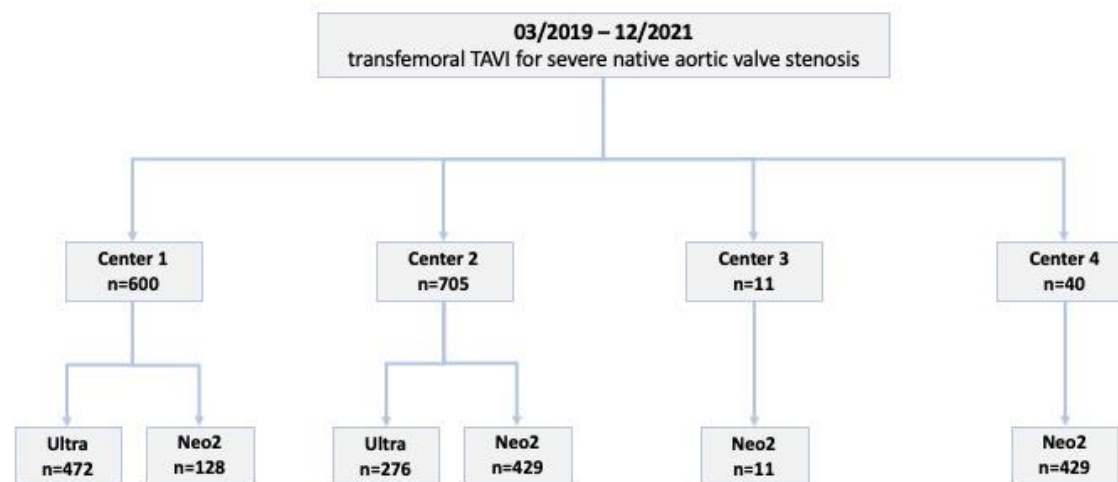

**Supplementary Figure 1.** Flow chart showing overview of treated patients according to participating centre.

Abbreviations: Neo2, ACURATE neo2; Ultra; SAPIEN 3 Ultra

## Supplemental Figure 2

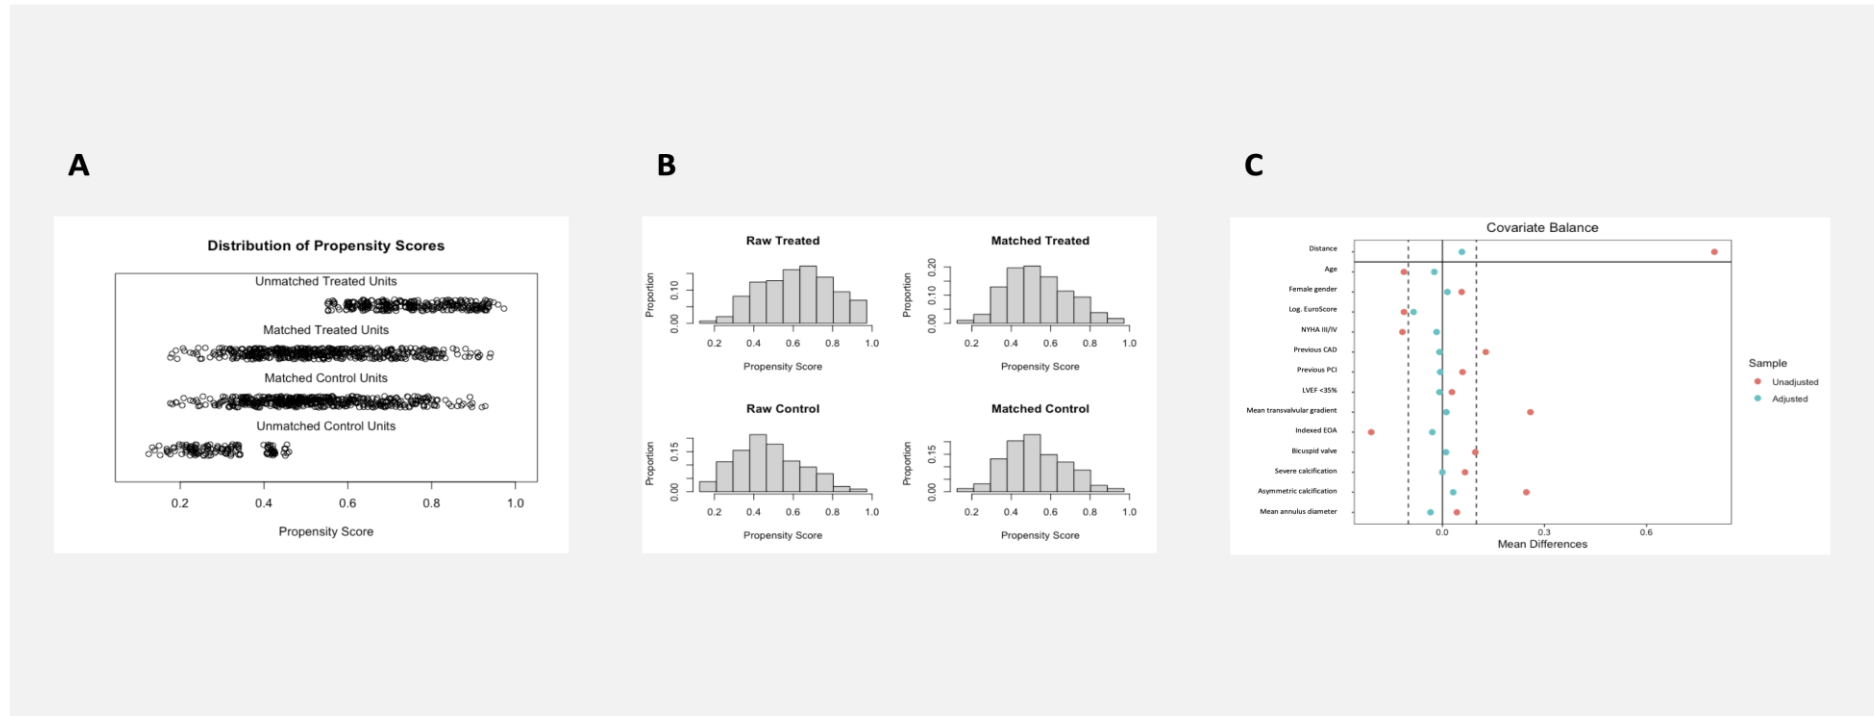

**Supplementary Figure 2.** Distribution of propensity score in treated and control patients (A), density of propensity score in treated and control patients (B) and Love plot (C).

Abbreviations: CAD, coronary artery disease; iEOA, indexed effective orifice area; LVEF, left ventricular ejection fraction; NYHA, New York Heart Association functional class; PCI, percutaneous coronary intervention.
